# Supplementary material for: ELISA detection of MPO-DNA complexes in human plasma is error-prone and yields limited information on neutrophil extracellular traps formed in vivo
Source: PubMed Central journal article supplement (PMC8062102; doi:10.1371/journal.pone.0250265), 2021-04-22

Fig. 4B

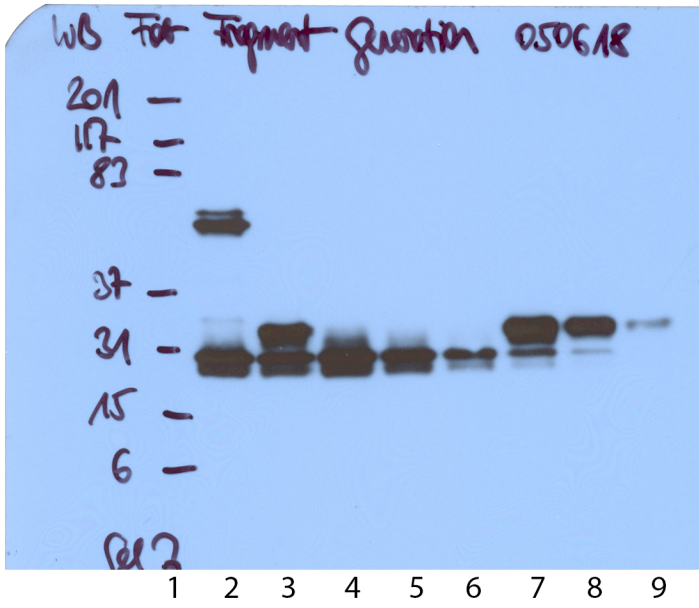

Fig. 4C

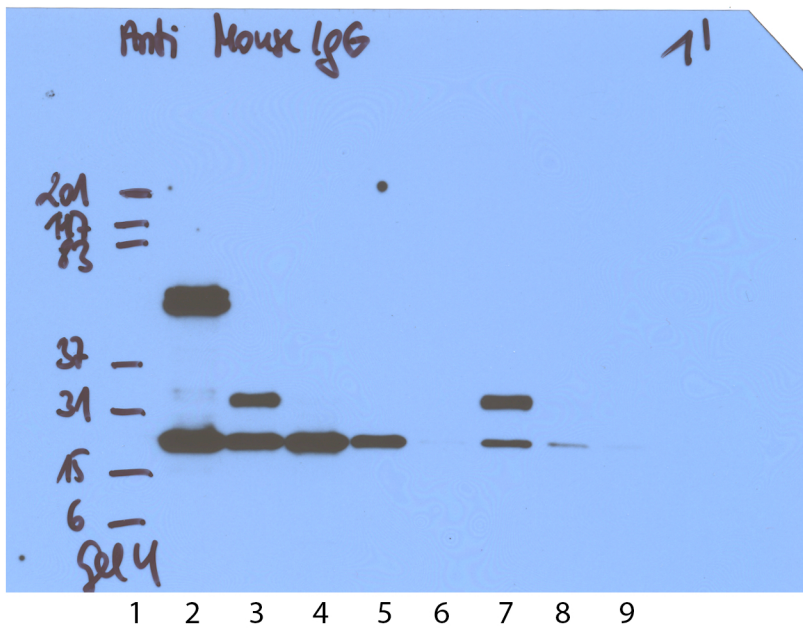

S Fig. 3B

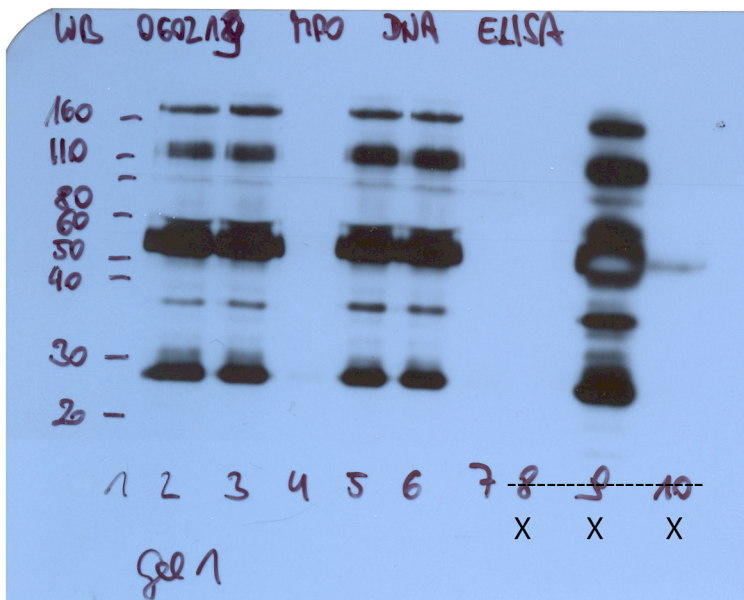

Supplement: pone.0250265.s008.pdf [file pone.0250265.s008.pdf]
